# Supplementary material
Source: Springer Nature journal article supplement (https://mijn.bsl.nl/resource/supplementary/13047_2008_7_MOESM2_ESM.pdf/7108868)

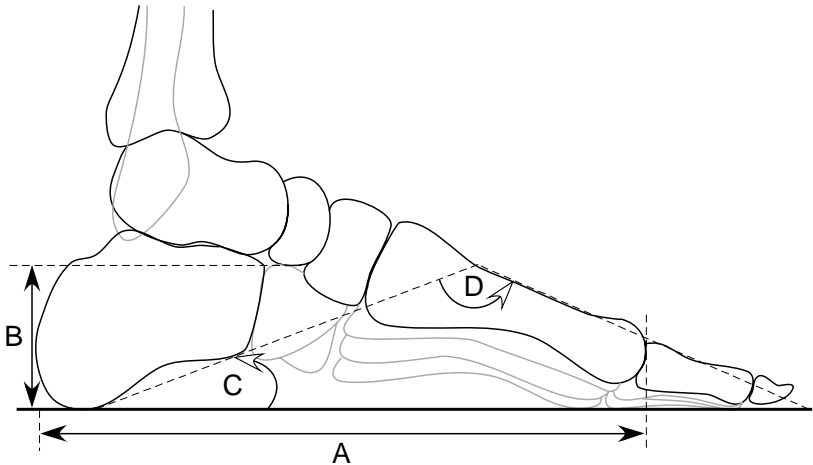

Supplement: MOESM2 [file 7108868]
